# Supplementary material for: Synthesis of core–shell ZnS@C microrods as advanced anode materials for lithium-ion batteries
Source: Royal Society of Chemistry journal article supplement (doi:10.1039/d2nj03342a), 2022-01-01
Supplement: d2nj03342a1.pdf [file d2nj03342a1.pdf]

## Supporting Information

### **Synthesis of core-shell ZnS@C micron-rods as high performance anode materials for lithium ion batteries**

Qianqian Li<sup>a,b,1</sup>, Man Zhang<sup>a,b,1</sup>, Yutong Nong<sup>a,b</sup>, Qichang Pan<sup>a,b,\*</sup>, Youguo Huang<sup>a,b</sup>,  
Hongqiang Wang<sup>a,b</sup>, Fenghua Zheng<sup>a,b,\*</sup>, Qingyu Li<sup>a,b</sup>

a Guangxi Key Laboratory of Low Carbon Energy Materials, School of Chemistry and Pharmaceutical Sciences, Guangxi Normal University, Guilin 541004, China

b Guangxi scientific and technological achievements transformation pilot research base of electrochemical energy materials and devices, Guangxi Normal University, Guilin 541004, China

\*Corresponding authors.

E-mail addresses: panqc0526@163.com (Q. Pan), zhengfh870627@163.com (F. Zheng).

<sup>1</sup>These authors contributed equally to this work.

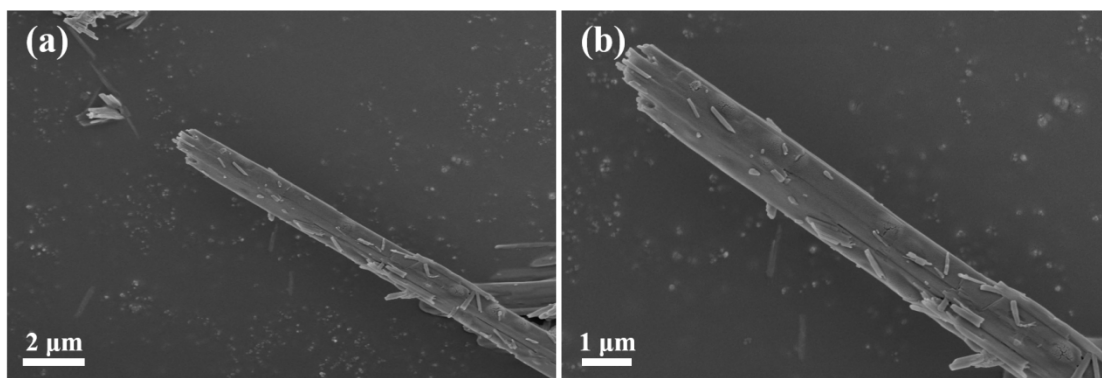

**Fig. S1** SEM images of  $\text{ZnC}_2\text{O}_4 \cdot 2\text{H}_2\text{O}$ .

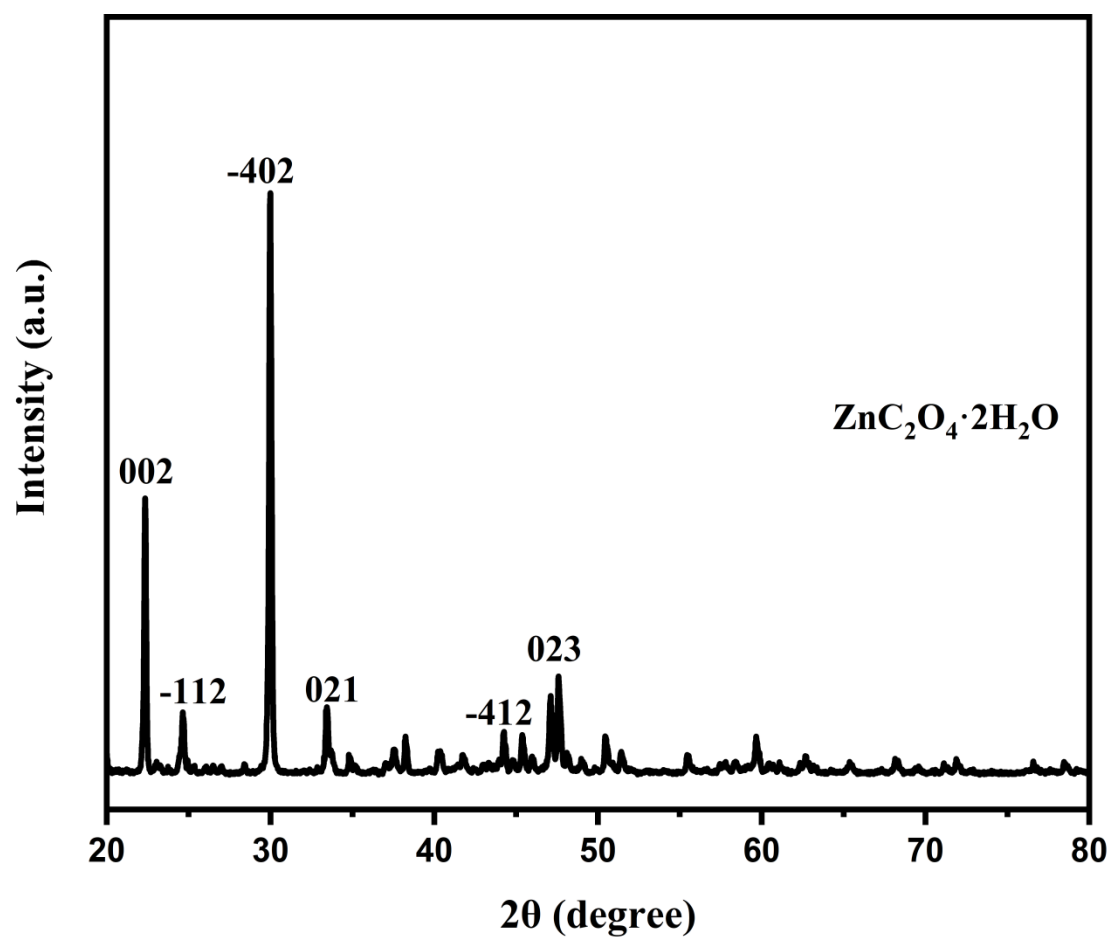

Fig. S2 The XRD patterns of  $\text{ZnC}_2\text{O}_4 \cdot 2\text{H}_2\text{O}$ .

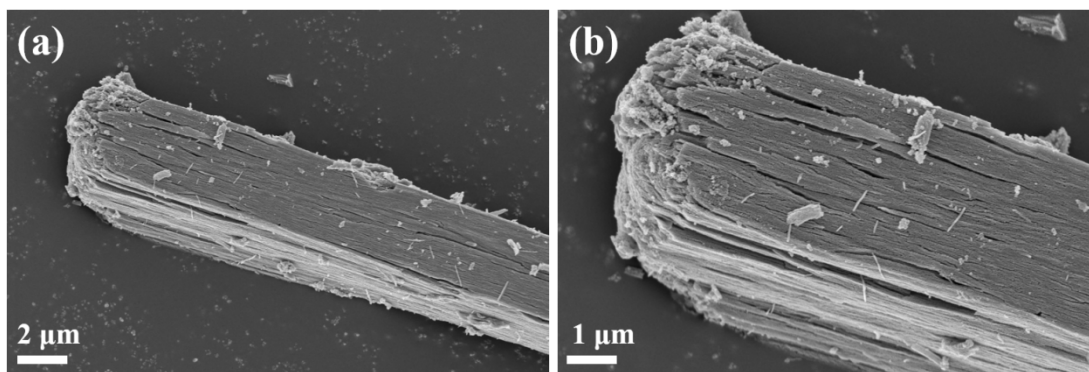

**Fig. S3** SEM images of ZnO.

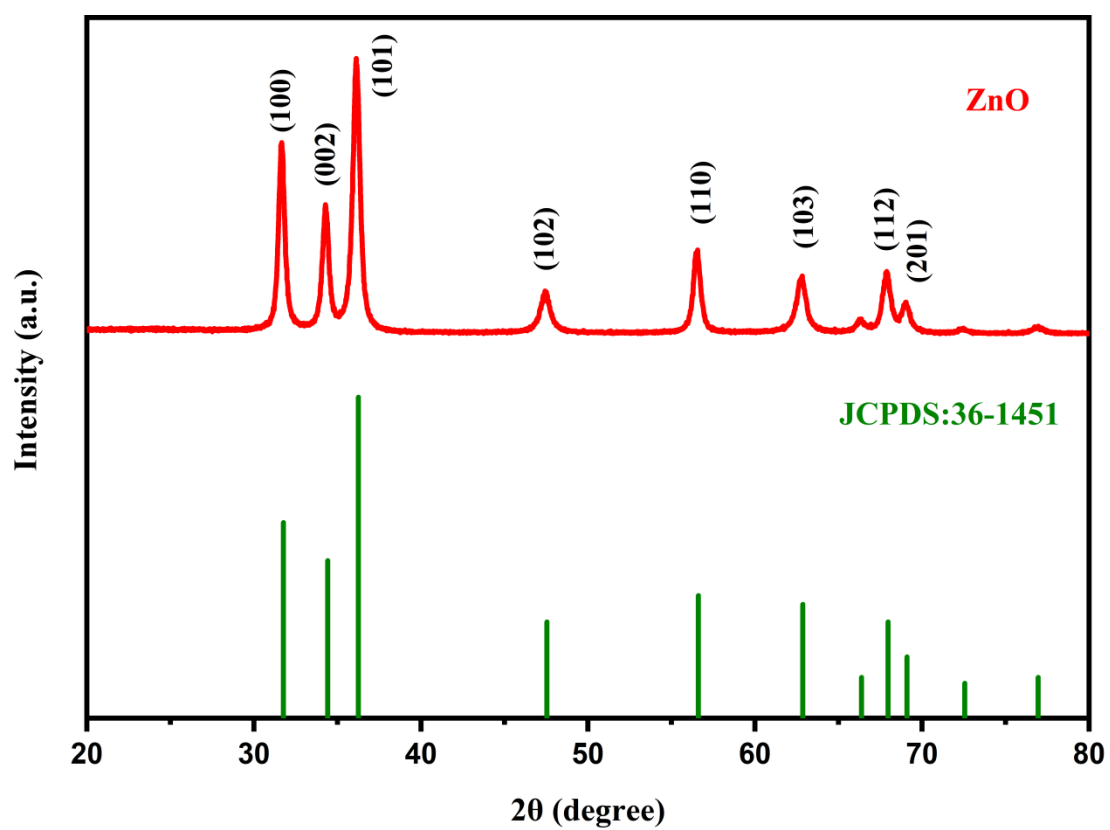

**Fig. S4** The XRD patterns of ZnO.

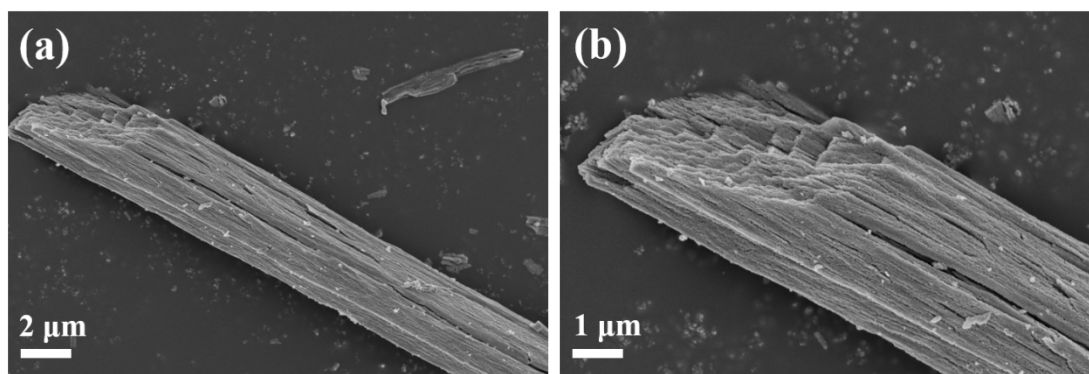

**Fig. S5** SEM images of ZnS.

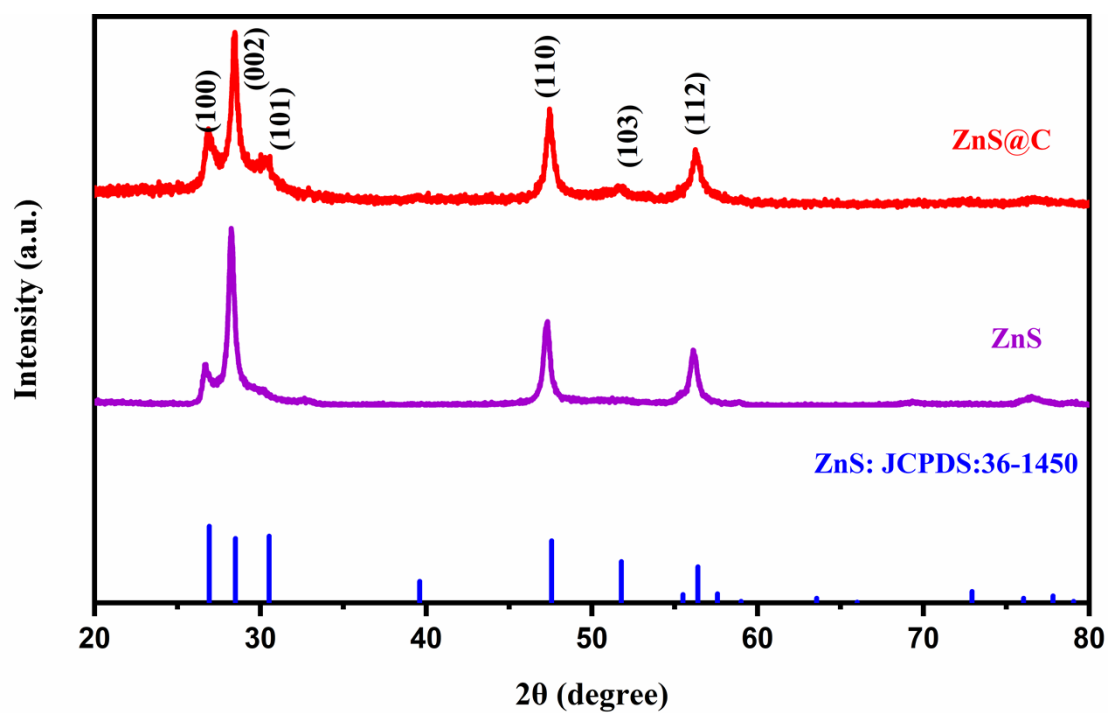

**Fig. S6** The XRD patterns of ZnS@C MRs and ZnS.

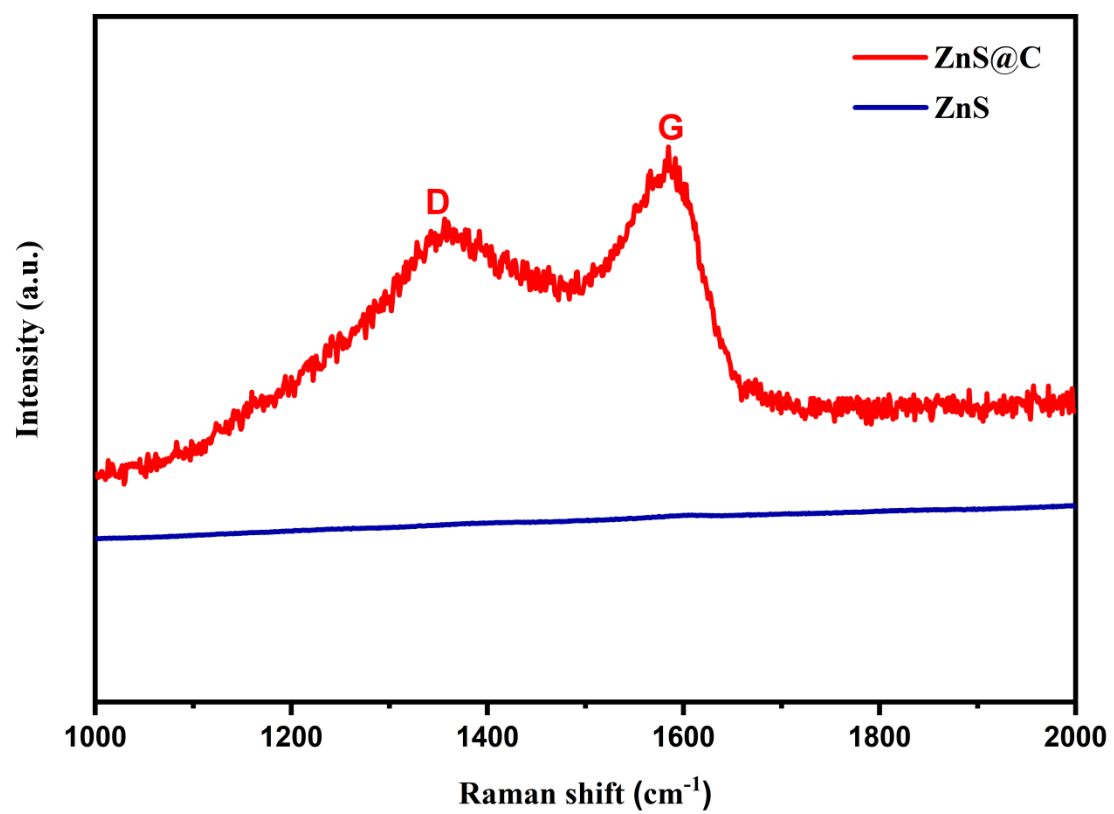

**Fig. S7** The Raman Spectra of ZnS@C MRs and ZnS.

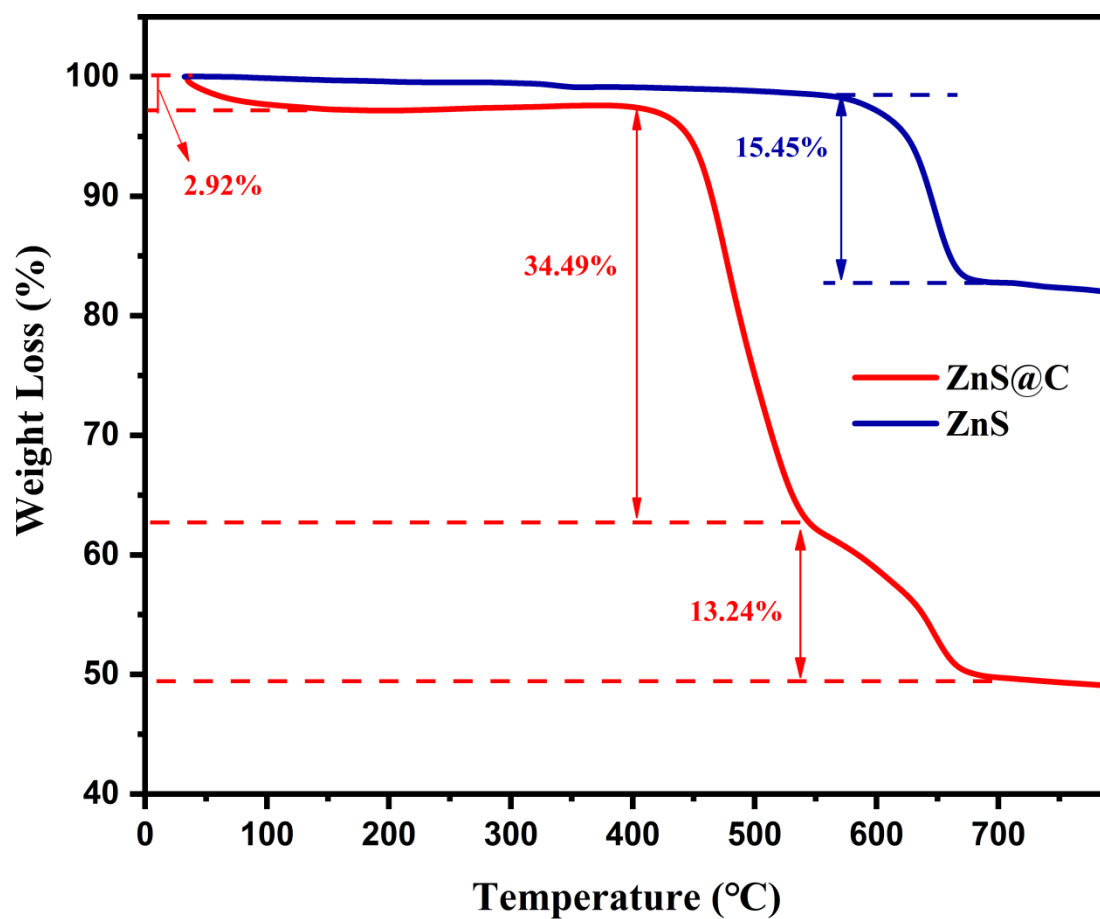

**Fig. S8** The TGA analysis of ZnS@C MRs and ZnS.

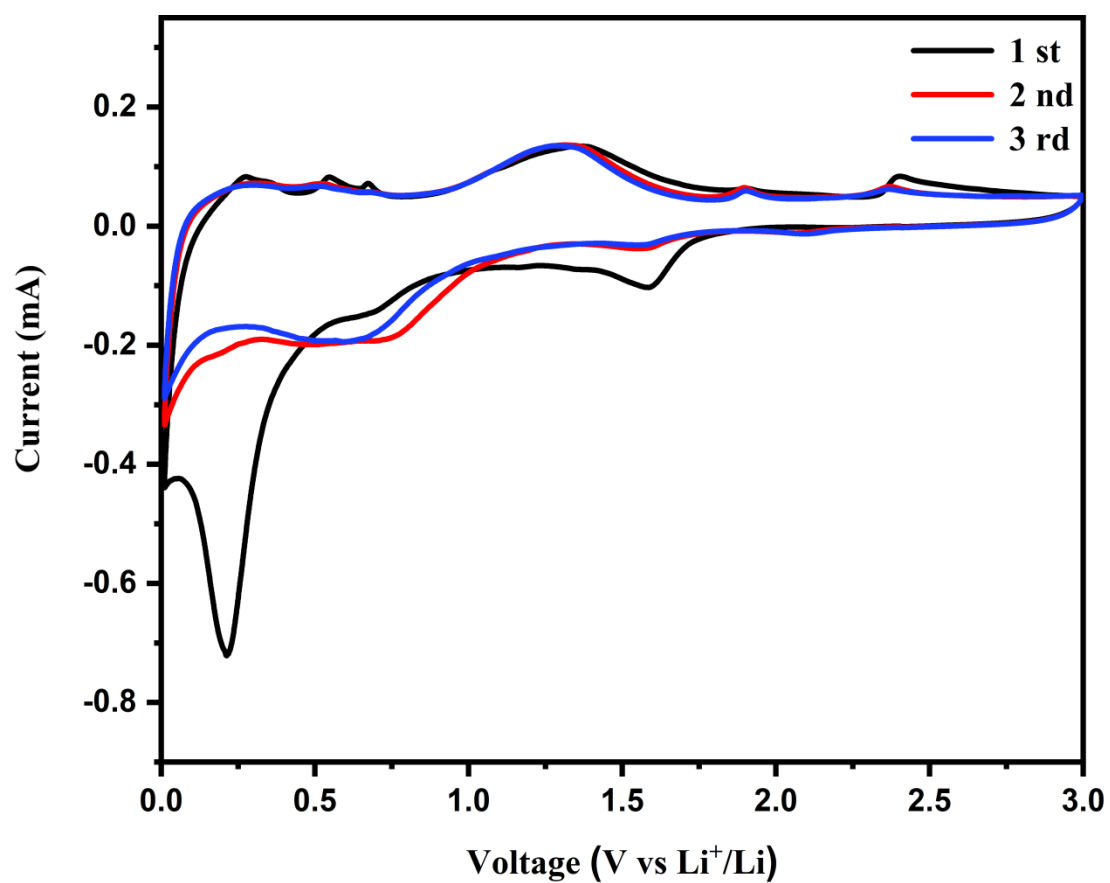

**Fig. S9** The CV spectrum of ZnS.

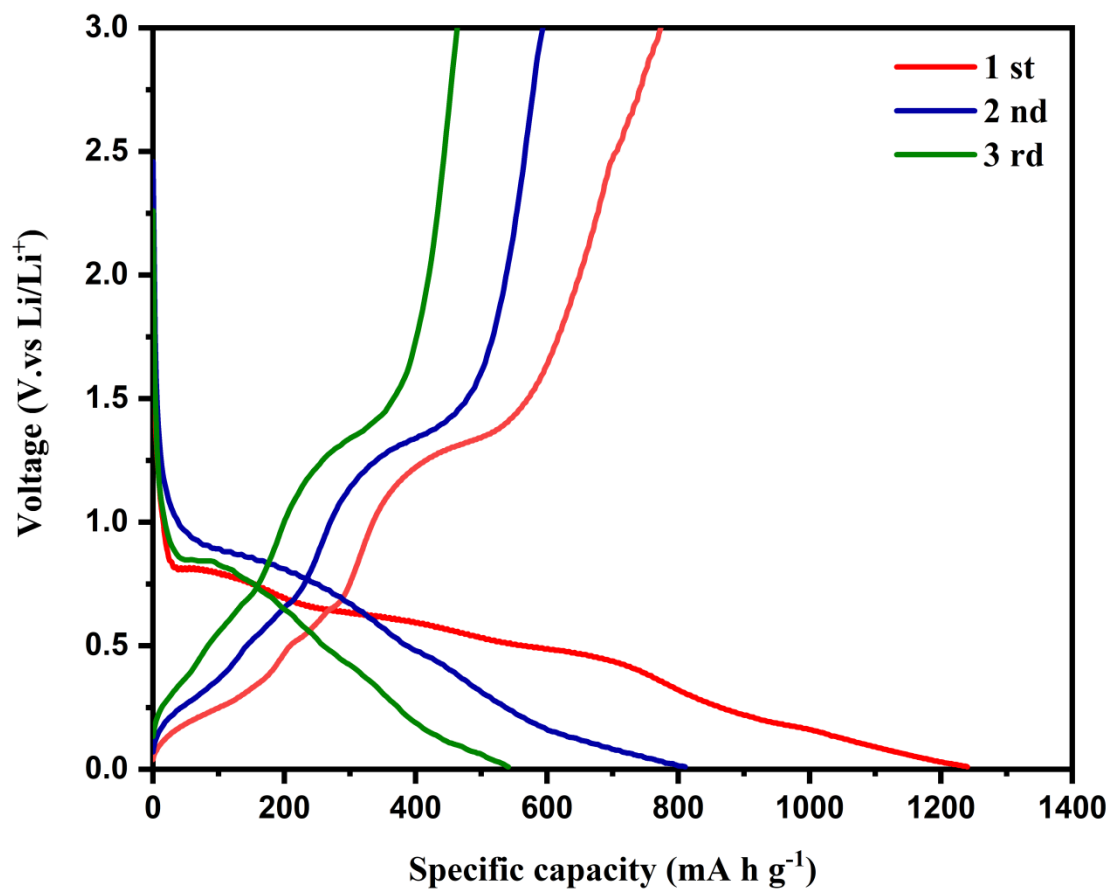

Fig. S10 Charge-discharge curves of ZnS in the initial three cycles.

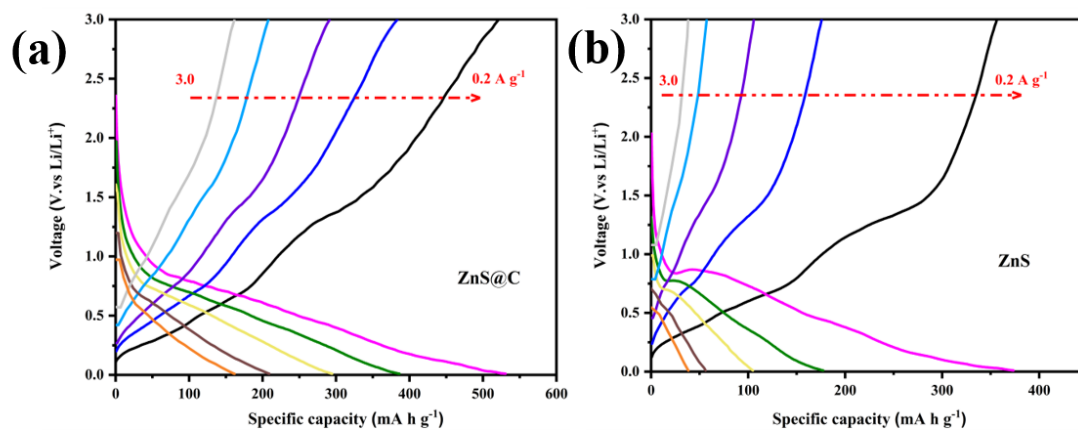

**Fig. S11** The discharge-charge curves of (a) ZnS@C MRs and (b) ZnS MRs under various current densities.

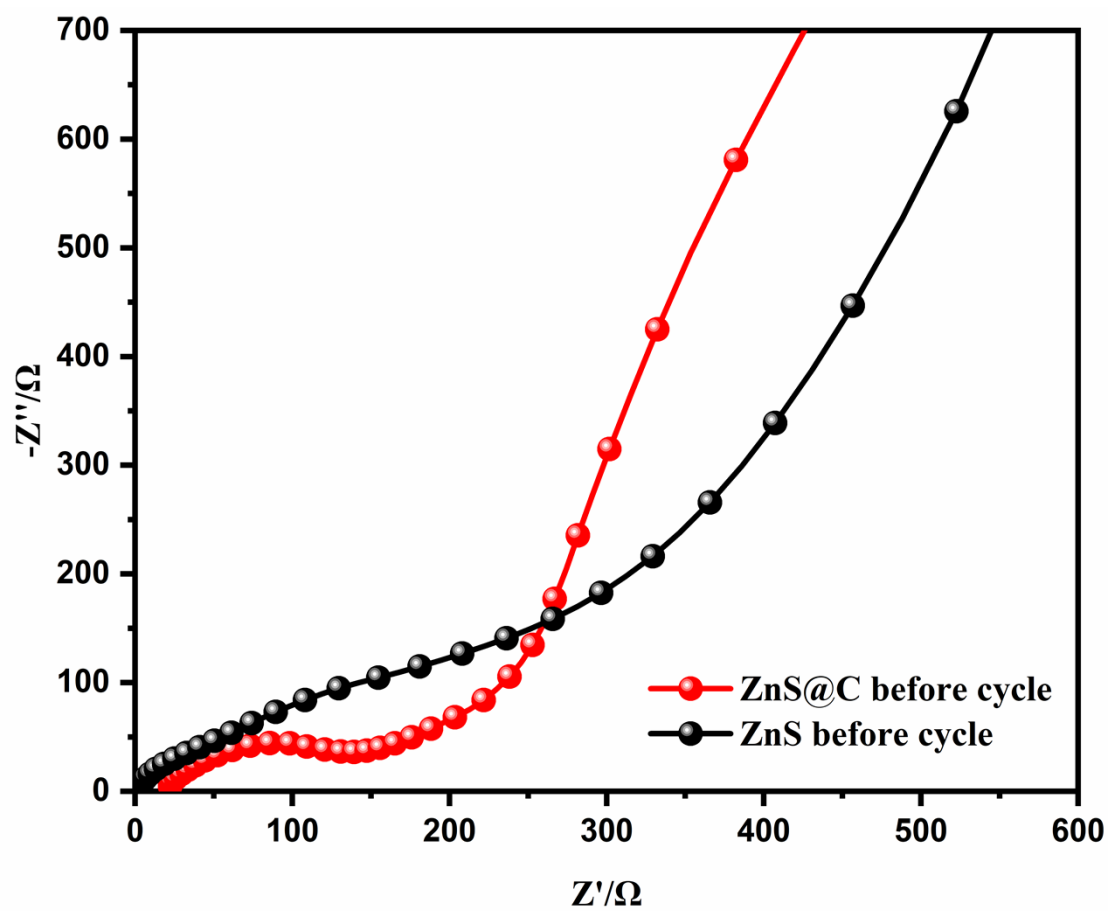

Fig. S12 The EIS curves of ZnS@C MRs and ZnS before cycle.

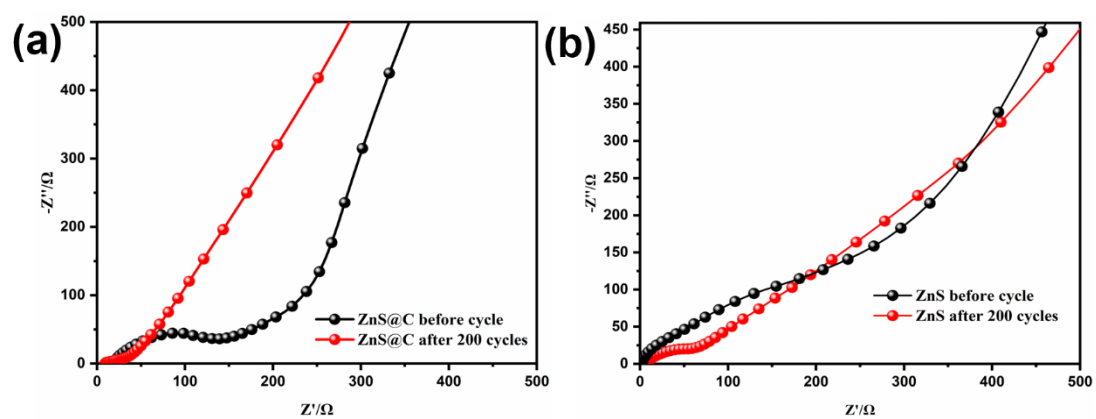

**Fig. S13** The EIS curves of (a) ZnS@C MRs and (b) ZnS before cycle and after 200 cycles.
